# Supplementary material for: Diagnostic Technology: Trends of Use and Availability in a 10-Year Period (2011–2020) among Sixteen OECD Countries
Source: MDPI journal article supplement (doi:10.3390/healthcare11142078), 2023-07-20
Supplement: s1 [file s1]

## Supplementary tables

**Table S1.** Computed Tomography (CT) Exams and Scanners in 16 OECD Countries, Years 2011–2019.

|                                 | Year    |         |         |         |         |         |         |         |         | AAPC<br>(95% CI)  |
|---------------------------------|---------|---------|---------|---------|---------|---------|---------|---------|---------|-------------------|
|                                 | 2011    | 2012    | 2013    | 2014    | 2015    | 2016    | 2017    | 2018    | 2019    |                   |
| United States                   |         |         |         |         |         |         |         |         |         |                   |
| Exams per scanner               | 6695.4  | 5851.2  | 5529.3  | 6215.1  | 5984.8  | 6062.8  | 5997.1  | 6094.1  | 6196.6  | −0.1 (−1.5, 1.4)  |
| Exams per 1000 population       | 273.8   | 256.8   | 240.5   | 255.0   | 245.4   | 253.8   | 256.2   | 271.4   | 278.4   | 0.0 (−0.7, 1.3)   |
| Scanners per million population | 40.89   | 43.89   | 43.49   | 41.04   | 41.00   | 41.86   | 42.72   | 44.53   | 44.92   | 0.6 (−1.3, 2.6)   |
| Israel                          |         |         |         |         |         |         |         |         |         |                   |
| Exams per scanner               | 14668.7 | 15720.7 | 15816.3 | 15000.1 | 13924.3 | 14375.3 | 15065.0 | 14633.1 | 15988.5 | 0.0 (−1.7, 1.8)   |
| Exams per 1000 population       | 126.6   | 139.1   | 141.3   | 140.6   | 131.3   | 136.3   | 145.2   | 146.6   | 158.9   | 1.8 (−0.6, 4.5)   |
| Scanners per million population | 8.63    | 8.85    | 8.93    | 9.37    | 9.43    | 9.48    | 9.64    | 10.02   | 9.94    | 1.9* (1.5, 2.2)   |
| South Korea                     |         |         |         |         |         |         |         |         |         |                   |
| Exams per scanner               | 3660.1  | 3869.5  | 4016.0  | 4446.6  | 4721.6  | 5058.5  | 5360.2  | 5916.9  | 6278.5  | 7.2* (6.8, 7.7)   |
| Exams per 1000 population       | 131.0   | 142.9   | 150.6   | 163.9   | 174.8   | 191.3   | 205     | 228.4   | 248.5   | 8.3* (8.0, 8.6)   |
| Scanners per million population | 35.79   | 36.93   | 37.50   | 36.85   | 37.03   | 37.82   | 38.24   | 38.60   | 39.58   | 1.0* (0.5, 1.5)   |
| Belgium                         |         |         |         |         |         |         |         |         |         |                   |
| Exams per scanner               | ..      | ..      | 8120.0  | 8868.6  | 8411.1  | 8348.9  | 8417.8  | 8451.2  | 8497.1  | −0.1 (−0.9, 0.8)  |
| Exams per 1000 population       | ..      | ..      | 186.3   | 193.1   | 198.4   | 199.7   | 200.5   | 201.9   | 204.9   | 1.5* (1.3, 1.7)   |
| Scanners per million population | ..      | ..      | 22.94   | 21.77   | 23.59   | 23.92   | 23.82   | 23.89   | 24.11   | 1.4* (0.5, 2.2)   |
| Czechia                         |         |         |         |         |         |         |         |         |         |                   |
| Exams per scanner               | 6061.7  | 6285.9  | 6374.4  | 6504.3  | 6321.8  | 6922.5  | 6569.2  | 6891.4  | 6958.8  | 1.5* (1.1, 2.0)   |
| Exams per 1000 population       | 89.5    | 94.5    | 95.8    | 98.3    | 101.9   | 107.4   | 103.5   | 110.9   | 114.1   | 2.8* (2.4, 3.2)   |
| Scanners per million population | 14.77   | 15.03   | 15.03   | 15.11   | 16.12   | 15.52   | 15.76   | 16.09   | 16.40   | 1.2* (0.9, 1.5)   |
| Finland                         |         |         |         |         |         |         |         |         |         |                   |
| Exams per scanner               | 1308.8  | 1603.3  | 1807.2  | 1825.1  | 1814.8  | 1723.1  | 2204.4  | 3484.8  | ..      | 11.8* (5.3, 20.4) |
| Exams per 1000 population       | 27.9    | 34.9    | 39.2    | 39.1    | 39.1    | 41.7    | 54.0    | 57.5    | ..      | 9.3* (5.3, 14.2)  |
| Scanners per million population | 21.34   | 21.80   | 21.70   | 21.42   | 21.53   | 24.20   | 24.51   | 16.50   | ..      | −0.1 (−3.8, 3.7)  |

|                                 |         |         |         |         |         |         |         |         |         |                    |
|---------------------------------|---------|---------|---------|---------|---------|---------|---------|---------|---------|--------------------|
| France                          |         |         |         |         |         |         |         |         |         |                    |
| Exams per scanner               | 12338.3 | 12753.4 | 12713.1 | 11709.3 | 11385.1 | 11446.3 | 10927.3 | 11069.8 | 10953.1 | -2.1* (-3.3, -0.9) |
| Exams per 1000 population       | 154.6   | 172.1   | 184.2   | 179.4   | 188.7   | 194.0   | 189.6   | 195.2   | 198.6   | 2.9* (2.1, 3.7)    |
| Scanners per million population | 12.53   | 13.49   | 14.49   | 15.32   | 16.57   | 16.95   | 17.35   | 17.63   | 18.13   | 4.7* (4.6, 4.8)    |
| Greece                          |         |         |         |         |         |         |         |         |         |                    |
| Exams per scanner               | ..      | 5420.1  | 4173.4  | 4854.1  | 4040.9  | 4186.0  | 5685.3  | 5265.3  | 4595.0  | 1.3 (-2.7, 5.5)    |
| Exams per 1000 population       | ..      | 181.1   | 140.4   | 168.0   | 146.0   | 150.3   | 194.5   | 213.9   | 195.4   | 4.7 (-1.0, 10.7)   |
| Scanners per million population | ..      | 33.41   | 33.65   | 34.61   | 36.13   | 35.91   | 34.22   | 40.62   | 42.53   | 3.7* (2.2, 4.5)    |
| Italy                           |         |         |         |         |         |         |         |         |         |                    |
| Exams per scanner               | ..      | ..      | 2605.6  | 2661.4  | 2655.1  | 2501.6  | 2599.8  | 2662.6  | 2668.7  | 0.2 (-0.8, 1.1)    |
| Exams per 1000 population       | ..      | ..      | 86.3    | 87.6    | 88.4    | 85.8    | 89.9    | 93.6    | 97.3    | 1.8* (1.1, 2.5)    |
| Scanners per million population | ..      | ..      | 33.10   | 32.90   | 33.31   | 34.29   | 34.57   | 35.15   | 36.45   | 1.7* (1.0, 2.3)    |
| Lithuania                       |         |         |         |         |         |         |         |         |         |                    |
| Exams per scanner               | 3555.5  | 3255.2  | 3683.5  | 3997.7  | 4512.7  | 4488.1  | 4556.5  | 4980.9  | 5004.7  | 5.6* (4.3, 6.9)    |
| Exams per 1000 population       | 71.6    | 77.4    | 87.2    | 88.6    | 94.8    | 103.3   | 106.3   | 120.9   | 132.5   | 7.5* (6.5, 8.6)    |
| Scanners per million population | 20.14   | 23.76   | 23.67   | 22.17   | 21.00   | 23.01   | 23.33   | 24.27   | 26.48   | 1.8 (-0.2, 3.9)    |
| Luxembourg                      |         |         |         |         |         |         |         |         |         |                    |
| Exams per scanner               | 7493.3  | 7919.6  | 8614.7  | 8802.8  | 10706.1 | 11154.5 | 11404.5 | 11988.7 | 12473.1 | 7.1* (6.0, 8.2)    |
| Exams per 1000 population       | 202.1   | 209.0   | 206.0   | 206.9   | 206.6   | 211.8   | 212.8   | 219.6   | 224.1   | 1.0* (0.8, 1.2)    |
| Scanners per million population | 25.08   | 24.48   | 22.08   | 21.57   | 17.56   | 17.14   | 16.77   | 16.45   | 16.13   | -5.4* (-6.3, -4.7) |
| Netherlands                     |         |         |         |         |         |         |         |         |         |                    |
| Exams per scanner               | 5654.5  | ..      | ..      | 5962.6  | 5875.0  | 6801.1  | 7149.7  | 7403.4  | 7456.7  | 4.2* (2.8, 6.0)    |
| Exams per 1000 population       | 70.8    | ..      | ..      | 79.5    | 80.8    | 88.7    | 96.4    | 105.3   | 110.9   | 5.9* (5.7, 6.2)    |
| Scanners per million population | 12.52   | ..      | ..      | 13.34   | 13.75   | 13.04   | 13.48   | 14.22   | 14.87   | 1.8* (0.9, 2.8)    |
| Poland                          |         |         |         |         |         |         |         |         |         |                    |
| Exams per scanner               | ..      | ..      | ..      | 4208.9  | 4087.3  | 4404.6  | 4825.8  | 4707.4  | 5536.3  | 5.6* (3.2, 7.8)    |
| Exams per 1000 population       | ..      | ..      | ..      | 65.8    | 70.2    | 76.3    | 81.5    | 85.4    | 100.6   | 8.1* (7.0, 9.0)    |
| Scanners per million population | ..      | ..      | ..      | 15.63   | 17.16   | 17.33   | 16.88   | 18.14   | 18.17   | 2.4* (0.4, 4.3)    |
| Slovakia                        |         |         |         |         |         |         |         |         |         |                    |
| Exams per scanner               | 6602.3  | 6924.5  | 8006.6  | 7770.1  | 8734.1  | 9375.2  | 8905.4  | 8450.9  | 9004.8  | 3.2* (2.1, 4.3)    |
| Exams per 1000 population       | 99.1    | 107.6   | 122.8   | 134.8   | 156.2   | 162.3   | 153.9   | 155.2   | 160.1   | 6.3* (5.0, 8.0)    |

|                                 |        |        |        |        |        |        |        |        |        |                  |
|---------------------------------|--------|--------|--------|--------|--------|--------|--------|--------|--------|------------------|
| Scanners per million population | 15.00  | 15.53  | 15.33  | 17.35  | 17.88  | 17.31  | 17.28  | 18.36  | 17.78  | 2.4* (1.4, 3.4)  |
| Spain                           |        |        |        |        |        |        |        |        |        |                  |
| Exams per scanner               | 5298.1 | 5260.7 | 5464.7 | 5757.1 | 5819.3 | 5990.2 | 6163.1 | 6175.4 | 6475.3 | 2.6* (2.4, 2.9)  |
| Exams per 1000 population       | 88.2   | 90.4   | 96.1   | 101.3  | 104.9  | 109.7  | 114.9  | 118.1  | 124.3  | 4.4* (4.2, 4.7)  |
| Scanners per million population | 16.64  | 17.19  | 17.59  | 17.60  | 18.02  | 18.31  | 18.65  | 19.12  | 19.2   | 1.8* (1.4, 2.1)  |
| Australia                       |        |        |        |        |        |        |        |        |        |                  |
| Exams per scanner               | 2057.7 | 2060.6 | 2047.2 | 2058.6 | 2007.0 | 1894.0 | 1958.6 | 2000.5 | 2020.2 | −0.5 (−1.3, 0.5) |
| Exams per 1000 population       | 91.2   | 104.1  | 109.8  | 115.4  | 119.5  | 119.3  | 126.0  | 134.6  | 140.9  | 4.7* (3.5, 6.0)  |
| Scanners per million population | 44.32  | 50.5   | 53.66  | 56.06  | 59.54  | 63.00  | 64.34  | 67.29  | 69.74  | 5.7* (5.2, 6.3)  |

Notes: Cells have two mid-dots (··) if no data are available; \* indicates that the AAPC obtained from segmented regression analysis is significantly different from zero. In France, before 2013 examinations practiced in private hospitals were wrongly compiled in ambulatory care, while during 2015 the official sources of data have been enhanced concerning all the equipment actually in use. In Poland, there was a change in data source in 2019 that led to the inclusion of specialty hospitals. In Australia, data relate to services rendered on a “fee-for-service” basis for which Medicare benefits were paid, which means that services that do not attract a Medicare benefit, such as those to public patients in hospitals or patients attending public Accident and Emergency Departments and public Outpatient Clinics, are excluded.

Abbreviations: OECD, Organisation for Economic Co-operation and Development; AAPC, average annual per cent change; CI, confidence interval.

**Table S2.** Magnetic Resonance Imaging (MRI) Exams and Units in 16 OECD Countries, Years 2011–2019.

|                                 | Year   |        |        |        |        |        |        |        |        | AAPC               |
|---------------------------------|--------|--------|--------|--------|--------|--------|--------|--------|--------|--------------------|
|                                 | 2011   | 2012   | 2013   | 2014   | 2015   | 2016   | 2017   | 2018   | 2019   | (95% CI)           |
| United States                   |        |        |        |        |        |        |        |        |        |                    |
| Exams per scanner               | ..     | 3042.1 | 3012.5 | 2876.0 | 3020.4 | 3287.0 | 2950.6 | 3042.1 | 3163.8 | 0.6 (−0.5, 1.7)    |
| Exams per 1000 population       | ..     | 104.8  | 106.9  | 109.6  | 117.9  | 120.7  | 111.0  | 119.3  | 127.9  | 2.5* (0.6, 4.5)    |
| Scanners per million population | ..     | 34.46  | 35.50  | 38.11  | 39.02  | 36.73  | 37.63  | 39.22  | 40.43  | 1.8* (0.3, 3.5)    |
| Israel                          |        |        |        |        |        |        |        |        |        |                    |
| Exams per scanner               | 7276.2 | 8530.8 | 9446.8 | 8234.5 | 8334.0 | 6915.6 | 7117.1 | 8621.3 | 9146.2 | 0.6 (−3.5, 5.8)    |
| Exams per 1000 population       | 19.7   | 28.0   | 30.5   | 32.1   | 34.8   | 36.4   | 38.4   | 46.6   | 47.5   | 9.2* (6.8, 12.1)   |
| Scanners per million population | 2.70   | 3.29   | 3.23   | 3.89   | 4.18   | 5.27   | 5.39   | 5.40   | 5.19   | 8.4* (7.1, 9.9)    |
| South Korea                     |        |        |        |        |        |        |        |        |        |                    |
| Exams per scanner               | 1095.6 | 1036.9 | 1074.9 | 1173.7 | 1187.5 | 1216.1 | 1247.7 | 1629.7 | 2308.3 | 10.1* (9.2, 11.2)  |
| Exams per 1000 population       | 23.3   | 24.2   | 26.2   | 29.9   | 31.2   | 33.8   | 36.3   | 49.1   | 73.8   | 15.4* (14.7, 16.1) |
| Scanners per million population | 21.27  | 23.37  | 24.35  | 25.50  | 26.27  | 27.82  | 29.13  | 30.11  | 31.99  | 4.7* (4.3, 5.2)    |
| Belgium                         |        |        |        |        |        |        |        |        |        |                    |
| Exams per scanner               | 6564.6 | 6968.2 | 7114.2 | 6919.8 | 7307.6 | 7674.6 | 8095.4 | 8196.5 | 8540.1 | 3.2* (2.6, 3.9)    |
| Exams per 1000 population       | 70.2   | 74.0   | 77.1   | 81.5   | 85.6   | 89.4   | 93.9   | 95.4   | 98.1   | 4.2* (4.1, 4.3)    |
| Scanners per million population | 10.69  | 10.62  | 10.84  | 11.78  | 11.71  | 11.65  | 11.60  | 11.64  | 11.49  | 1.2* (0.7, 1.7)    |
| Czechia                         |        |        |        |        |        |        |        |        |        |                    |
| Exams per scanner               | 5678.8 | 6221.9 | 6095.5 | 6249.2 | 5747.6 | 5846.8 | 5582.4 | 5288.3 | 5777.5 | −1.6* (−2.7, −0.5) |
| Exams per 1000 population       | 39.0   | 43.2   | 45.2   | 46.3   | 48.0   | 49.8   | 52.7   | 54.7   | 60.1   | 4.8* (3.9, 5.6)    |
| Scanners per million population | 6.86   | 6.95   | 7.42   | 7.41   | 8.34   | 8.52   | 9.44   | 10.35  | 10.40  | 6.0* (5.6, 6.4)    |
| Finland                         |        |        |        |        |        |        |        |        |        |                    |
| Exams per scanner               | 1318.2 | 1447.2 | 1549.0 | 1520.9 | 1609.2 | 1628.9 | 1736.7 | 1809.6 | ..     | 4.0* (3.0, 5.0)    |
| Exams per 1000 population       | 26.7   | 31.3   | 34.2   | 35.4   | 41.7   | 41.5   | 47.0   | 49.5   | ..     | 8.5* (7.6, 9.5)    |
| Scanners per million population | 20.23  | 21.61  | 22.06  | 23.25  | 25.91  | 25.48  | 27.05  | 27.38  | ..     | 4.6* (3.9, 5.3)    |
| France                          |        |        |        |        |        |        |        |        |        |                    |
| Exams per scanner               | 8991.9 | 9477.8 | 9506.1 | 8650.3 | 8170.6 | 8173.2 | 8031.3 | 8095.0 | 8004.4 | −2.2* (−3.5, −0.6) |
| Exams per 1000 population       | 67.5   | 82.0   | 89.3   | 93.9   | 102.6  | 110.7  | 114.0  | 119.2  | 122.8  | 7.8* (5.6, 10.0)   |

|                                 |        |        |        |        |        |        |        |        |        |                    |
|---------------------------------|--------|--------|--------|--------|--------|--------|--------|--------|--------|--------------------|
| Scanners per million population | 7.51   | 8.65   | 9.40   | 10.86  | 12.56  | 13.55  | 14.20  | 14.73  | 15.34  | 9.2* (8.8, 9.5)    |
| Greece                          |        |        |        |        |        |        |        |        |        |                    |
| Exams per scanner               | ..     | 3099.2 | 2438.0 | 2550.2 | 2444.0 | 2379.3 | 2761.2 | 2841.1 | 2739.6 | -0.4 (-2.0, 2.2)   |
| Exams per 1000 population       | ..     | 67.9   | 53.8   | 58.3   | 60.5   | 64.0   | 73.2   | 83.4   | 87.4   | 5.0* (3.8, 6.8)    |
| Scanners per million population | ..     | 21.91  | 22.07  | 22.86  | 24.77  | 26.91  | 26.50  | 29.35  | 31.90  | 5.7* (4.4, 7.1)    |
| Italy                           |        |        |        |        |        |        |        |        |        |                    |
| Exams per scanner               | ..     | ..     | 3107.7 | 3034.1 | 2760.7 | 2375.4 | 2490.0 | 2569.7 | 2495.1 | -3.9* (-5.7, -2.2) |
| Exams per 1000 population       | ..     | ..     | 78.3   | 79.5   | 78.0   | 67.5   | 71.4   | 73.7   | 75.4   | -1.4 (-3.6, 0.8)   |
| Scanners per million population | ..     | ..     | 25.20  | 26.19  | 28.24  | 28.40  | 28.66  | 28.68  | 30.22  | 2.8* (2.3, 3.2)    |
| Lithuania                       |        |        |        |        |        |        |        |        |        |                    |
| Exams per scanner               | 4040.4 | 2760.6 | 3196.1 | 3461.7 | 3702.0 | 3692.5 | 4047.7 | 4602.0 | 4798.6 | 5.9* (3.3, 8.7)    |
| Exams per 1000 population       | 24.0   | 27.7   | 33.5   | 36.6   | 40.8   | 45.1   | 50.1   | 57.5   | 67.0   | 13.0* (11.6, 14.8) |
| Scanners per million population | 5.94   | 10.04  | 10.48  | 10.57  | 11.02  | 12.2   | 12.37  | 12.49  | 13.96  | 6.3* (3.4, 9.6)    |
| Luxembourg                      |        |        |        |        |        |        |        |        |        |                    |
| Exams per scanner               | 5681.7 | 5653.1 | 5907.7 | 5996.6 | 6064.3 | 6306.0 | 6231.4 | 6509.3 | 5604.9 | 0.7 (-0.1, 1.3)    |
| Exams per 1000 population       | 82.5   | 80.3   | 82.4   | 82.2   | 81.9   | 83.8   | 81.4   | 83.5   | 90.6   | 1.1* (0.1, 1.7)    |
| Scanners per million population | 13.50  | 13.18  | 12.88  | 12.58  | 12.29  | 12.00  | 11.74  | 11.51  | 14.52  | 0.5 (-0.7, 1.1)    |
| Netherlands                     |        |        |        |        |        |        |        |        |        |                    |
| Exams per scanner               | 3880.9 | ..     | ..     | 3982.2 | 4136.2 | 3815.5 | 3925.8 | 3994.0 | 4297.3 | 0.7 (-0.5, 1.9)    |
| Exams per 1000 population       | 50.0   | ..     | ..     | 51.2   | 51.8   | 48.8   | 51.1   | 52.2   | 59.5   | 1.6* (0.5, 2.3)    |
| Scanners per million population | 12.88  | ..     | ..     | 12.87  | 12.51  | 12.80  | 13.02  | 13.06  | 13.84  | 0.7* (0.3, 1.0)    |
| Poland                          |        |        |        |        |        |        |        |        |        |                    |
| Exams per scanner               | ..     | ..     | ..     | 3996.4 | 3644.2 | 3785.6 | 4349.0 | 4040.5 | 4552.3 | 3.5* (0.8, 6.4)    |
| Exams per 1000 population       | ..     | ..     | ..     | 26.4   | 27.8   | 29.8   | 34.5   | 37.2   | 42.2   | 10.3* (8.3, 12.4)  |
| Scanners per million population | ..     | ..     | ..     | 6.60   | 7.63   | 7.87   | 7.93   | 9.22   | 9.27   | 6.5* (5.3, 7.6)    |
| Slovakia                        |        |        |        |        |        |        |        |        |        |                    |
| Exams per scanner               | 4932.1 | 6499.0 | 6958.4 | 6212.5 | 6415.3 | 6808.1 | 6585.4 | 7281.7 | 7727.5 | 3.5* (1.4, 6.0)    |
| Exams per 1000 population       | 34.7   | 40.9   | 46.3   | 51.6   | 56.8   | 61.4   | 63.0   | 69.5   | 73.7   | 9.7* (9.1, 10.6)   |
| Scanners per million population | 7.04   | 6.29   | 6.65   | 8.30   | 8.85   | 9.02   | 9.56   | 9.55   | 9.53   | 5.5* (3.6, 7.6)    |
| Spain                           |        |        |        |        |        |        |        |        |        |                    |
| Exams per scanner               | 4580.2 | 4369.1 | 4533.3 | 4989.9 | 4942.9 | 5172.6 | 5407.4 | 5370.7 | 5621.0 | 3.1* (2.0, 4.3)    |

|                                 |        |        |        |        |        |        |        |        |        |                    |
|---------------------------------|--------|--------|--------|--------|--------|--------|--------|--------|--------|--------------------|
| Exams per 1000 population       | 63.0   | 64.5   | 69.5   | 77.4   | 78.3   | 83.2   | 88.6   | 92.4   | 99.1   | 5.9* (5.5, 6.3)    |
| Scanners per million population | 13.76  | 14.77  | 15.34  | 15.51  | 15.85  | 16.09  | 16.38  | 17.20  | 17.63  | 2.8* (2.3, 3.3)    |
| Australia                       |        |        |        |        |        |        |        |        |        |                    |
| Exams per scanner               | 4304.5 | 4727.5 | 1994.0 | 2409.1 | 2824.1 | 2964.1 | 3164.6 | 3413.8 | 3471.6 | -5.1* (-7.1, -2.4) |
| Exams per 1000 population       | 24.1   | 26.0   | 27.6   | 35.3   | 40.9   | 42.4   | 44.8   | 48.1   | 51.3   | 10.6* (9.3, 12.4)  |
| Scanners per million population | 5.60   | 5.50   | 13.84  | 14.65  | 14.49  | 14.30  | 14.15  | 14.09  | 14.78  | 17.3* (13.7, 21.6) |

Notes: Cells have two mid-dots (··) if no data are available; \* indicates that the AAPC obtained from segmented regression analysis is significantly different from zero. In Israel, the increase in the number of MRI exams in 2018 is mainly due to an increasing number of hospitals reporting these data. In Belgium, since 2016 data are based on the national registry for devices of medical image and correspond to the number of MRI-devices. In France, before 2013 examinations practiced in private hospitals were wrongly compiled in ambulatory care, while during 2015 the official sources of data have been enhanced concerning all the equipment actually in use. In Poland, there was a change in data source in 2019 that led to the inclusion of specialty hospitals. In Australia, data relate to services rendered on a “fee-for-service” basis for which Medicare benefits were paid, which means that services that do not attract a Medicare benefit, such as those to public patients in hospitals or patients attending public Accident and Emergency Departments and public Outpatient Clinics, are excluded.

Abbreviations: OECD, Organisation for Economic Co-operation and Development; AAPC, average annual per cent change; CI, confidence interval

**Table S3.** Positron Emission Tomography (PET) Exams and Scanners in 16 OECD Countries, Years 2011–2019.

|                                 | Year   |        |        |        |        |        |        |        |        | AAPC                 |
|---------------------------------|--------|--------|--------|--------|--------|--------|--------|--------|--------|----------------------|
|                                 | 2011   | 2012   | 2013   | 2014   | 2015   | 2016   | 2017   | 2018   | 2019   | (95% CI)             |
| United States                   |        |        |        |        |        |        |        |        |        |                      |
| Exams per scanner               | 1278.4 | 1098.0 | ..     | 988.9  | 1044.7 | ..     | ..     | 1216.3 | 1229.5 | 0.5 (−4.5, 6.3)      |
| Exams per 1000 population       | 5.9    | 5.5    | ..     | 5.1    | 5.4    | ..     | ..     | 6.4    | 6.7    | 2.2 (−1.4, 6.3)      |
| Scanners per million population | 4.65   | 5.00   | ..     | 5.14   | 5.13   | ..     | ..     | 5.25   | 5.45   | 1.5* (0.3, 2.8)      |
| Israel                          |        |        |        |        |        |        |        |        |        |                      |
| Exams per scanner               | 4871.7 | 5716.7 | 4596.4 | 5295.7 | 5293.3 | 5999.9 | 6520.7 | 7014.5 | 6393.7 | 4.9* (1.7, 8.7)      |
| Exams per 1000 population       | 3.8    | 4.3    | 5.1    | 5.8    | 5.7    | 6.3    | 7.5    | 8.7    | 9.2    | 11.4* (9.2, 14.3)    |
| Scanners per million population | 0.77   | 0.76   | 1.12   | 1.10   | 1.07   | 1.05   | 1.15   | 1.24   | 1.44   | 6.3* (2.4, 10.8)     |
| South Korea                     |        |        |        |        |        |        |        |        |        |                      |
| Exams per scanner               | 2051.9 | 1853.0 | 1831.5 | 1846.3 | 977.0  | 926.9  | 1002.6 | 983.9  | 1118.5 | −10.2* (−16.9, −4.4) |
| Exams per 1000 population       | 6.8    | 7.1    | 7.5    | 7.5    | 3.9    | 3.8    | 3.9    | 3.7    | 4.1    | −9.5* (−18.2, −1.9)  |
| Scanners per million population | 3.30   | 3.80   | 4.10   | 4.08   | 3.96   | 4.06   | 3.89   | 3.78   | 3.69   | 1.3* (0.5, 2.1)      |
| Belgium                         |        |        |        |        |        |        |        |        |        |                      |
| Exams per scanner               | 2628.2 | 2670.5 | 2699.3 | 2644.7 | 2930.9 | 2695.1 | 2657.3 | 2864.1 | 2921.3 | 1.0 (−0.1, 2.1)      |
| Exams per 1000 population       | 6.2    | 6.5    | 6.8    | 7.1    | 7.5    | 5.7    | 7.0    | 7.5    | 8.4    | 2.6 (−0.1, 5.5)      |
| Scanners per million population | 2.36   | 2.43   | 2.51   | 2.68   | 2.57   | 2.12   | 2.64   | 2.63   | 2.87   | 1.5 (−0.9, 4.0)      |
| Czechia                         |        |        |        |        |        |        |        |        |        |                      |
| Exams per scanner               | 4226.5 | 4216.5 | 3366.6 | 3976.6 | 3115.5 | 2390.1 | 2891.9 | 3282.3 | 3435.7 | −3.2* (−5.7, −0.9)   |
| Exams per 1000 population       | 3.2    | 3.2    | 3.2    | 3.0    | 3.2    | 3.6    | 4.6    | 5.2    | 5.5    | 7.9* (6.6, 9.2)      |
| Scanners per million population | 0.76   | 0.76   | 0.95   | 0.76   | 1.04   | 1.51   | 1.60   | 1.60   | 1.59   | 12.0* (6.9, 19.1)    |
| Finland                         |        |        |        |        |        |        |        |        |        |                      |
| Exams per scanner               | 70.4   | 118.7  | 179.2  | 265.8  | 257.6  | 269.4  | 252.4  | 333.6  | ..     | 20.8* (15.4, 26.4)   |
| Exams per 1000 population       | 0.1    | 0.3    | 0.4    | 0.6    | 0.7    | 0.7    | 0.7    | 0.9    | ..     | 27.0* (21.1, 34.2)   |
| Scanners per million population | 1.86   | 2.22   | 2.21   | 2.38   | 2.55   | 2.55   | 2.90   | 2.72   | ..     | 5.7* (2.5, 8.8)      |
| France                          |        |        |        |        |        |        |        |        |        |                      |
| Exams per scanner               | ..     | ..     | 3413.9 | 3305.5 | 3115.2 | 3300.8 | 3399.5 | 3889.6 | 3818.6 | 2.3* (1.8, 2.9)      |
| Exams per 1000 population       | ..     | ..     | 4.9    | 5.4    | 6.1    | 6.9    | 7.5    | 9.0    | 9.5    | 12.5* (11.9, 12.9)   |

|                                 |        |        |        |        |        |        |        |        |        |                    |
|---------------------------------|--------|--------|--------|--------|--------|--------|--------|--------|--------|--------------------|
| Scanners per million population | ..     | ..     | 1.43   | 1.63   | 1.95   | 2.08   | 2.20   | 2.32   | 2.48   | 9.8* (9.5, 10.2)   |
| Greece                          |        |        |        |        |        |        |        |        |        |                    |
| Exams per scanner               | ..     | ..     | 1040.0 | 1430.0 | 900.0  | 884.6  | 1468.2 | 1923.4 | 1639.7 | 12.5* (4.5, 23.2)  |
| Exams per 1000 population       | ..     | ..     | 0.5    | 0.7    | 0.8    | 1.1    | 1.6    | 2.3    | 2.1    | 30.3* (23.7, 40.6) |
| Scanners per million population | ..     | ..     | 0.46   | 0.46   | 0.92   | 1.21   | 1.12   | 1.21   | 1.31   | 19.6* (16.0, 23.9) |
| Italy                           |        |        |        |        |        |        |        |        |        |                    |
| Exams per scanner               | ..     | ..     | 1567.5 | 1620.9 | 1602.5 | 1538.5 | 1572.5 | 1622.7 | 1589.9 | 0.1 (−0.7, 0.8)    |
| Exams per 1000 population       | ..     | ..     | 4.5    | 4.7    | 4.9    | 5.0    | 5.2    | 5.6    | 5.6    | 4.0* (3.5, 4.3)    |
| Scanners per million population | ..     | ..     | 2.89   | 2.90   | 3.05   | 3.23   | 3.34   | 3.44   | 3.55   | 3.9* (3.4, 4.3)    |
| Lithuania                       |        |        |        |        |        |        |        |        |        |                    |
| Exams per scanner               | ..     | ..     | 445.0  | 311.5  | 558.5  | 636.5  | 726.5  | 902.5  | 1048.0 | 20.8* (17.4, 24.9) |
| Exams per 1000 population       | ..     | ..     | 0.2    | 0.2    | 0.4    | 0.4    | 0.5    | 0.6    | 0.8    | 25.0* (21.4, 29.0) |
| Scanners per million population | ..     | ..     | 0.34   | 0.68   | 0.69   | 0.70   | 0.71   | 0.71   | 0.72   | 4.2 (−0.4, 9.1)    |
| Luxembourg                      |        |        |        |        |        |        |        |        |        |                    |
| Exams per scanner               | 1862.0 | 1825.0 | 2133.0 | 2153.0 | 2205.0 | 2400.0 | 2660.0 | 3029.0 | 3395.0 | 8.1* (7.4, 8.7)    |
| Exams per 1000 population       | 3.9    | 3.7    | 4.2    | 4.2    | 4.3    | 4.6    | 5.0    | 5.5    | 6.1    | 6.2* (5.6, 6.7)    |
| Scanners per million population | 1.93   | 1.88   | 1.84   | 1.80   | 1.76   | 1.71   | 1.68   | 1.64   | 1.61   | −1.8* (−2.4, −1.1) |
| Netherlands                     |        |        |        |        |        |        |        |        |        |                    |
| Exams per scanner               | 960.6  | 799.6  | ..     | 1308.4 | ..     | ..     | 1390.4 | 1373.4 | 1461.8 | 6.3* (3.7, 8.9)    |
| Exams per 1000 population       | 3.0    | 2.5    | ..     | 4.6    | ..     | ..     | 5.9    | 6.5    | 6.6    | 12.6* (9.2, 16.8)  |
| Scanners per million population | 3.12   | 3.10   | ..     | 3.50   | ..     | ..     | 4.26   | 4.70   | 4.50   | 5.9* (4.7, 7.2)    |
| Poland                          |        |        |        |        |        |        |        |        |        |                    |
| Exams per scanner               | ..     | ..     | ..     | 1520.6 | 1747.8 | 1999.5 | 2435.3 | 1863.1 | 1742.8 | 2.3 (−9.0, 16.7)   |
| Exams per 1000 population       | ..     | ..     | ..     | 1.1    | 1.2    | 1.4    | 1.5    | 1.6    | 1.5    | 7.0* (0.8, 14.3)   |
| Scanners per million population | ..     | ..     | ..     | 0.71   | 0.68   | 0.68   | 0.63   | 0.87   | 0.87   | 4.6 (−2.9, 12.7)   |
| Slovakia                        |        |        |        |        |        |        |        |        |        |                    |
| Exams per scanner               | 806.0  | 1051.0 | 1077.3 | 1186.4 | 1115.6 | 1274.8 | 1304.4 | 1535.8 | 1672.5 | 7.6* (5.9, 9.9)    |
| Exams per 1000 population       | 0.7    | 1.0    | 1.2    | 1.5    | 1.6    | 1.9    | 1.9    | 2.3    | 2.5    | 17.0* (15.6, 18.8) |
| Scanners per million population | 0.93   | 0.92   | 1.11   | 1.29   | 1.47   | 1.47   | 1.47   | 1.47   | 1.47   | 7.4* (7.0, 7.8)    |
| Spain                           |        |        |        |        |        |        |        |        |        |                    |
| Exams per scanner               | 1526.1 | 1448.8 | 1512.4 | 1613.0 | 1736.2 | 1885.2 | 2167.2 | 2331.8 | 2598.8 | 6.9* (6.4, 8.1)    |



|                                 |       |       |       |       |       |       |       |       |        |                    |
|---------------------------------|-------|-------|-------|-------|-------|-------|-------|-------|--------|--------------------|
| Exams per 1000 population       | 2.1   | 2.1   | 2.3   | 2.6   | 2.8   | 3.2   | 3.7   | 4.2   | 4.6    | 10.7* (10.2, 11.7) |
| Scanners per million population | 1.35  | 1.43  | 1.54  | 1.59  | 1.64  | 1.70  | 1.72  | 1.79  | 1.76   | 3.5* (3.3, 3.6)    |
| Australia                       |       |       |       |       |       |       |       |       |        |                    |
| Exams per scanner               | 983.0 | 945.4 | 965.4 | 926.4 | 930.0 | 883.7 | 938.4 | 901.6 | 1037.7 | 0.3 (−0.2, 0.7)    |
| Exams per 1000 population       | 1.4   | 1.7   | 2.0   | 2.2   | 2.5   | 2.7   | 3.1   | 3.5   | 3.9    | 13.4* (12.9, 14.1) |
| Scanners per million population | 1.43  | 1.85  | 2.03  | 2.39  | 2.65  | 3.06  | 3.29  | 3.84  | 3.75   | 12.6* (11.2, 14.3) |

Notes: Cells have two mid-dots (··) if no data are available; \* indicates that the AAPC obtained from segmented regression analysis is significantly different from zero. In South Korea, the decrease in PET exams in 2015 is due to a change of payment standard for medical expenses. In Belgium, before 2016 PET activity was overestimated due to the partial inclusion of gamma camera activity. In France, before 2013 examinations practiced in private hospitals were wrongly compiled in ambulatory care, while during 2015 the official sources of data have been enhanced concerning all the equipment actually in use. In Poland, there was a change in data source in 2019 that led to the inclusion of specialty hospitals. In Australia, data relate to services rendered on a “fee-for-service” basis for which Medicare benefits were paid, which means that services that do not attract a Medicare benefit, such as those to public patients in hospitals or patients attending public Accident and Emergency Departments and public Outpatient Clinics, are excluded.

Abbreviations: OECD, Organisation for Economic Co-operation and Development; AAPC, average annual per cent change; CI, confidence interval
